# Supplementary material
Source: HighWire-hosted journal article supplement (http://www.cmaj.ca/highwire/filestream/59137/field_highwire_adjunct_files/0/diet-salvado-1-at.pdf)

## Appendix 1: Flow of participants through the PREDIMED trial (as supplied by the authors)

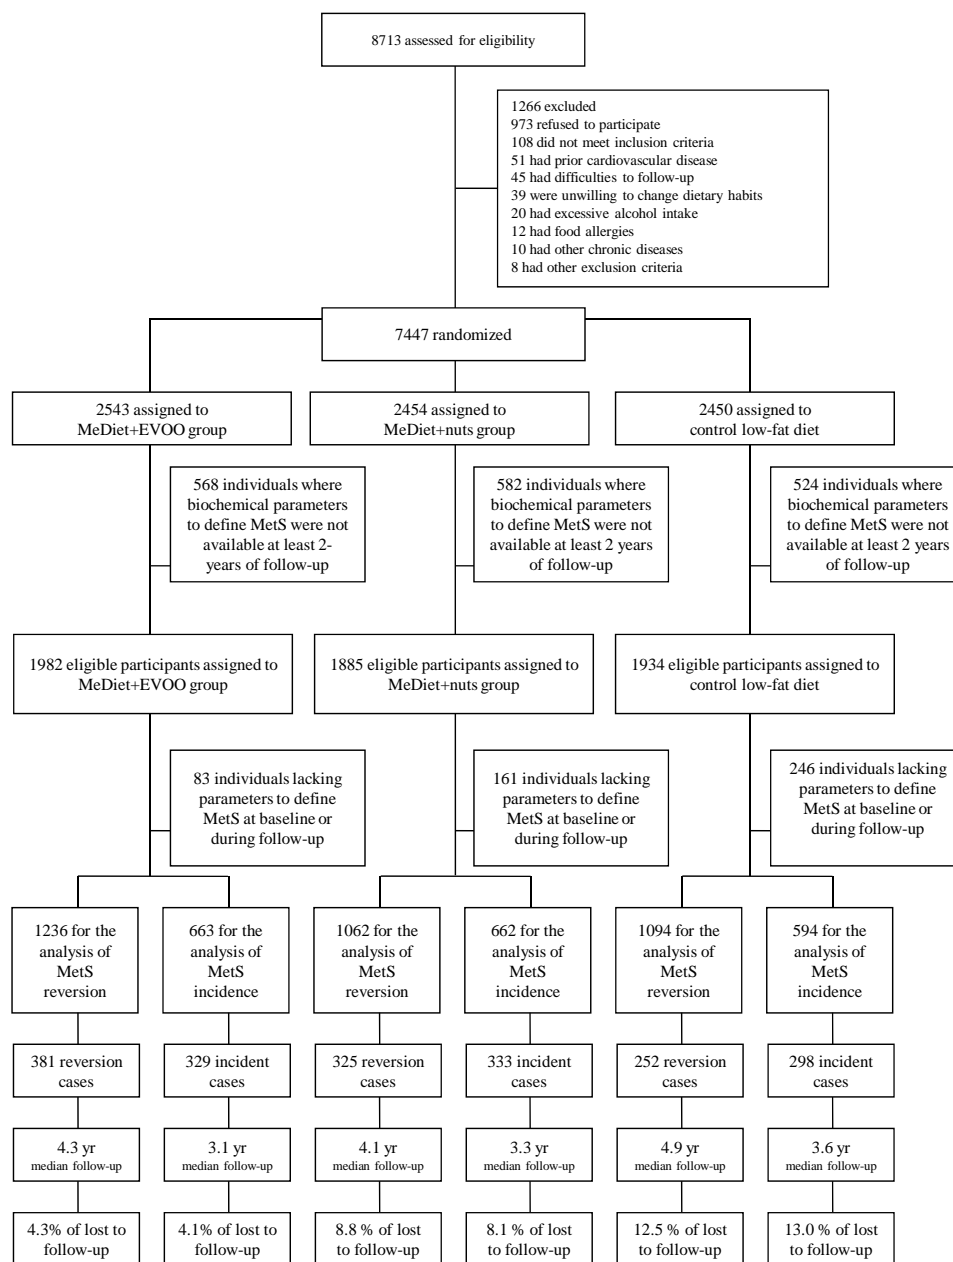

Supplement: diet-salvado-1-at.pdf [file diet-salvado-1-at.pdf]
